# Supplementary material for: Triclosan activates c-Jun/miR-218-1-3p/SLC35C1 signaling to regulate cell viability, migration, invasion and inflammatory response of trophoblast cells in vitro
Source: Springer Nature journal article supplement (doi:10.1186/s12884-022-04791-z), 2022-06-06
Supplement: MOESM3 [file 23131382]

## 细胞遗传质量鉴定检验报告

检品名称：细胞系

检验类型：STR 基因型检验

样品编号：

表 1 样本编号

| 客户样本编号 | 公司编号        |
|--------|-------------|
| 125    | 20170221-07 |

样品数量：1

样品性状：细胞系

检测项目：STR

送检单位：上海富衡生物科技有限公司

检测方法：用 Axygen 的基因组抽提试剂盒提取 DNA，采用 20-STR 扩增方案扩增，在 ABI 3730XL 型遗传分析仪上对 STR 位点和性别基因 Amelogenin 进行检测。

检验结果：

### (一) 检验基本情况

表 2：样本基因型检验结果

|             | 多等位基因 | 匹配细胞系   | 细胞库  | EV 值 | 匹配说明 |
|-------------|-------|---------|------|------|------|
| 20170221-07 | 无     | JEG-3 等 | DSMZ | 1    | 完全匹配 |

● 多等位基因指三等位及以上基因现象。

## Analysis

- 本次检测各细胞分型结果良好。

### (二) 各样本描述

- 20170221-07: 该株细胞 DNA 分型在细胞系检索中找到**完全匹配**的细胞系, DSMZ 数据库显示细胞名为 **JEG-3 等**, 细胞号对应 **463 等**。本次检测在该细胞系中**没有发现多等位基因**。

### (三) 样本分型结果

表 3: 细胞 20170221-07 的 STR 位点和 Amelogenin 位点的基因分型结果

| Marker  | 样本      |         |         |         | 细胞库信息   |         |         |
|---------|---------|---------|---------|---------|---------|---------|---------|
|         | Allele1 | Allele2 | Allele3 | Allele4 | Allele1 | Allele2 | Allele3 |
| D5S818  | 10      | 11      |         |         | 10      | 11      |         |
| D13S317 | 9       | 11      |         |         | 9       | 11      |         |
| D7S820  | 10      | 12      |         |         | 10      | 12      |         |
| D16S539 | 13      | 14      |         |         | 13      | 14      |         |
| VWA     | 16      | 16      |         |         | 16      | 16      |         |
| TH01    | 9       | 9.3     |         |         | 9       | 9.3     |         |
| AMEL    | X       | Y       |         |         | X       | Y       |         |
| TPOX    | 8       | 8       |         |         | 8       | 8       |         |
| CSF1PO  | 11      | 12      |         |         | 11      | 12      |         |
| D12S391 | 17      | 24      |         |         |         |         |         |
| FGA     | 23      | 24      |         |         |         |         |         |
| D2S1338 | 24      | 24      |         |         |         |         |         |
| D21S11  | 30      | 30      |         |         |         |         |         |
| D18S51  | 14      | 14      |         |         |         |         |         |
| D8S1179 | 12      | 12      |         |         |         |         |         |
| D3S1358 | 15      | 16      |         |         |         |         |         |
| D6S1043 | 11      | 11      |         |         |         |         |         |
| PENTAE  | 8       | 12      |         |         |         |         |         |
| D19S433 | 13      | 15      |         |         |         |         |         |
| PENTAD  | 9       | 12      |         |         |         |         |         |

其他说明:

(一) 分型方案及位点分布:

---

附表：实验方案及位点

|   | 方案 1        | 方案 2    | 方案 3        | 方案 4    |
|---|-------------|---------|-------------|---------|
| 1 | TH01        | TPOX    | D3S135<br>8 | AMEL    |
| 2 | D12S39<br>1 | VWA     | D13S31<br>7 | D5S818  |
| 3 | D7S820      | D8S1179 | D6S104<br>3 | D2S1338 |
| 4 | CSF1PO      | PENTAD  | D16S53<br>9 | D21S11  |
| 5 | FGA         |         | D19S43<br>3 | D18S51  |
| 6 | PENTAE      |         |             |         |

---

---

Cell Line Authenticaion-10

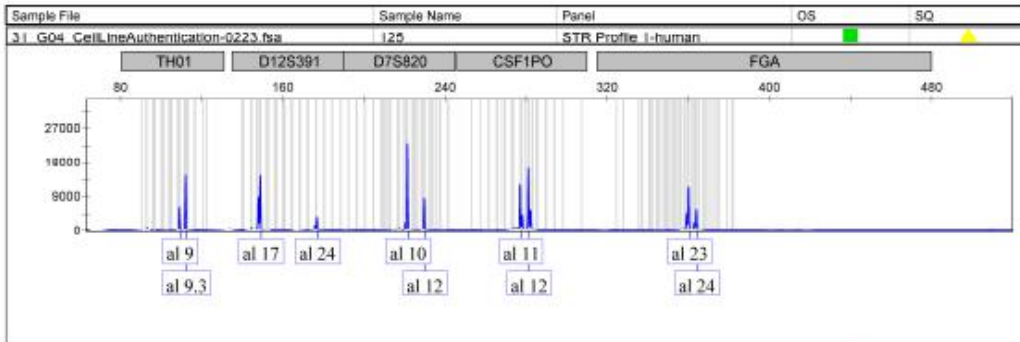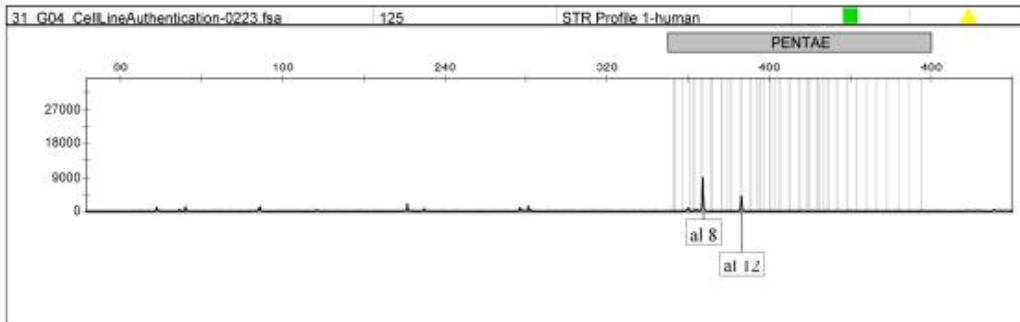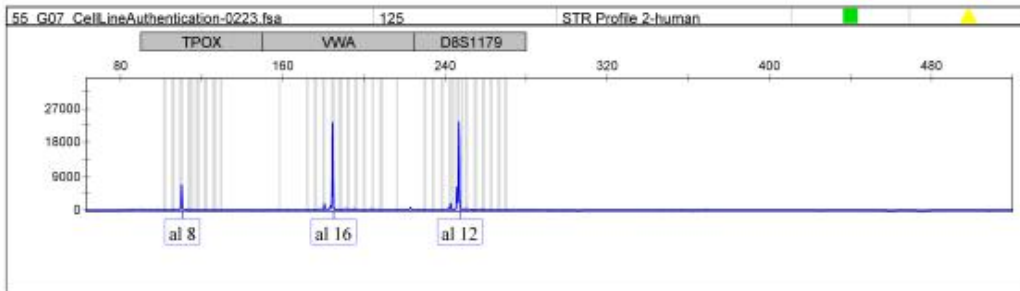

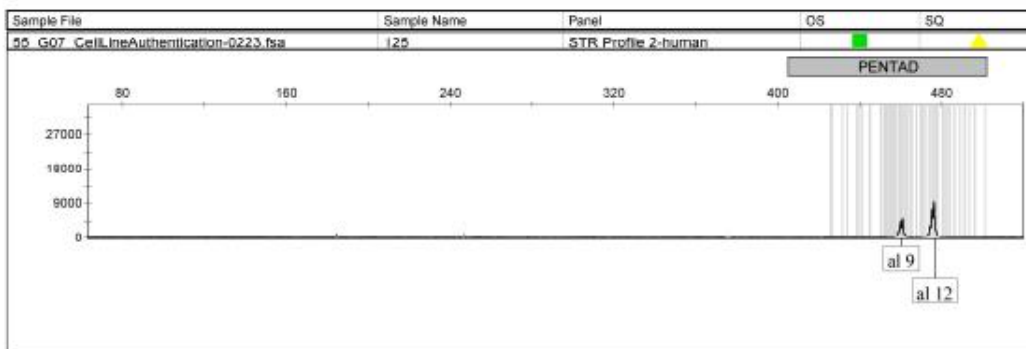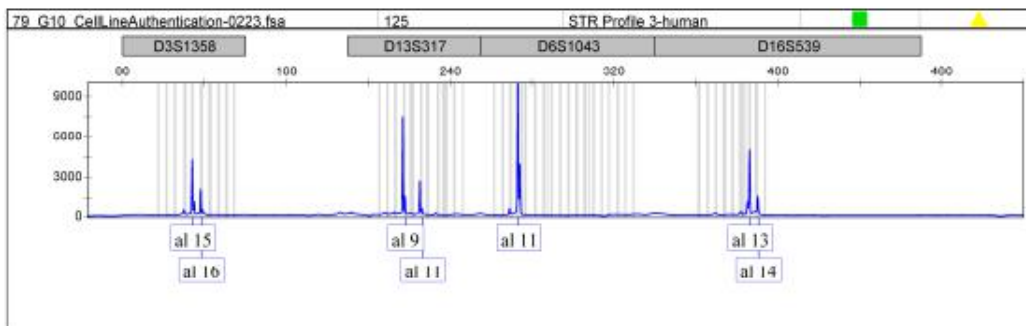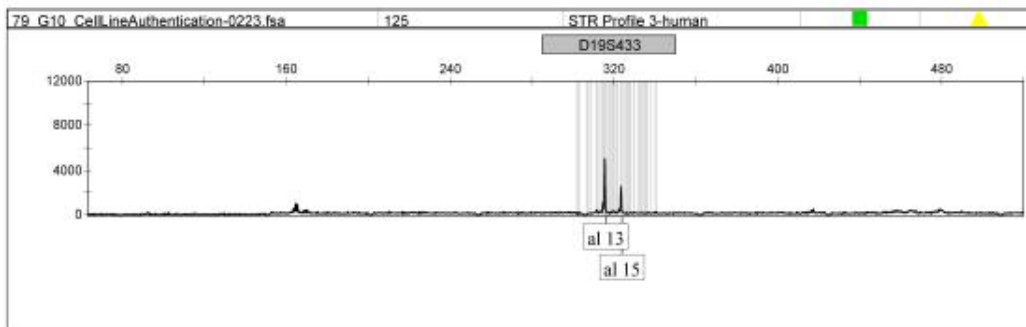

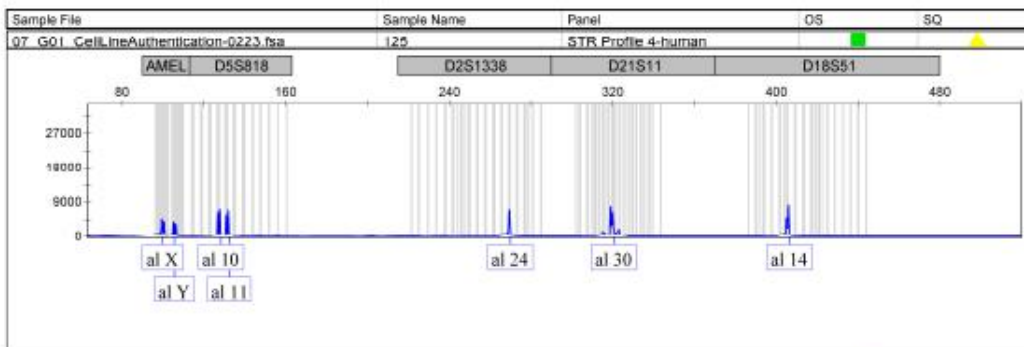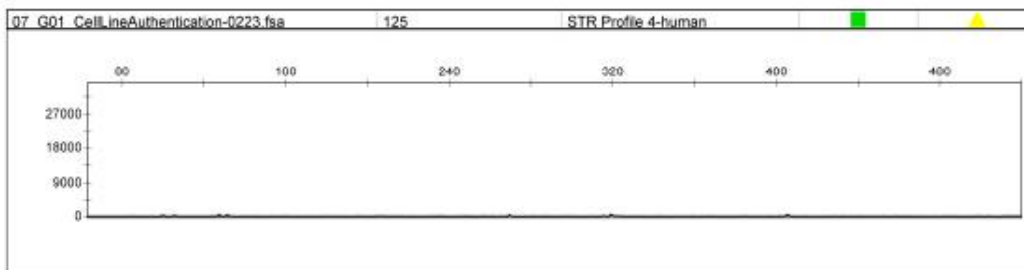

签发日期:  
 2017年03月
