# Supplementary material for: Triclosan activates c-Jun/miR-218-1-3p/SLC35C1 signaling to regulate cell viability, migration, invasion and inflammatory response of trophoblast cells in vitro
Source: Springer Nature journal article supplement (doi:10.1186/s12884-022-04791-z), 2022-06-06
Supplement: MOESM5 [file 23131382]

Supplementary file 4: CT values for in PCR.

| Figure    | Cell                | Plasmid transfection/cell treatment | Gene          | CT values |       |       |
|-----------|---------------------|-------------------------------------|---------------|-----------|-------|-------|
| Fig. 1A   | JEG3                | Control                             | miR-218-1-3p  | 27.53     | 27.73 | 27.79 |
|           | HTR-8               | Control                             | miR-218-1-3p  | 26.48     | 26.49 | 26.71 |
|           | JEG3                | TCS                                 | miR-218-1-3p  | 25.43     | 25.6  | 25.24 |
|           | HTR-8               | TCS                                 | miR-218-1-3p  | 23.48     | 23.1  | 23.36 |
|           | JEG3                | Control                             | U6            | 18.89     | 18.96 | 19.47 |
|           | HTR-8               | Control                             | U6            | 18.05     | 18.11 | 18.46 |
|           | JEG3                | TCS                                 | U6            | 19.61     | 18.65 | 18.68 |
| HTR-8     | TCS                 | U6                                  | 18            | 17.74     | 17.71 |       |
| Fig. 1B   | JEG3                | NC mimics                           | miR-218-1-3p  | 27.75     | 27.45 | 27.66 |
|           | HTR-8               | NC mimics                           | miR-218-1-3p  | 26.21     | 26.21 | 26.41 |
|           | JEG3                | miR-218-1-3p mimics                 | miR-218-1-3p  | 25.05     | 24.84 | 24.71 |
|           | HTR-8               | miR-218-1-3p mimics                 | miR-218-1-3p  | 23.85     | 23.43 | 23.54 |
|           | JEG3                | NC mimics                           | U6            | 19.02     | 19.36 | 18.94 |
|           | HTR-8               | NC mimics                           | U6            | 18.38     | 18.03 | 17.51 |
|           | JEG3                | miR-218-1-3p mimics                 | U6            | 18.8      | 19.09 | 18.66 |
| HTR-8     | miR-218-1-3p mimics | U6                                  | 17.53         | 17.81     | 17.58 |       |
| Fig. 1E   | JEG3                | NC mimics                           | IL-6          | 23.34     | 23.36 | 23.84 |
|           | HTR-8               | NC mimics                           | IL-6          | 23.18     | 23.52 | 23.21 |
|           | JEG3                | miR-218-1-3p mimics                 | IL-6          | 22.77     | 22.46 | 22.36 |
|           | HTR-8               | miR-218-1-3p mimics                 | IL-6          | 22.12     | 22.45 | 22.26 |
|           | JEG3                | NC mimics                           | GAPDH         | 19.66     | 19.43 | 18.94 |
|           | HTR-8               | NC mimics                           | GAPDH         | 17.89     | 18.8  | 18.75 |
|           | JEG3                | miR-218-1-3p mimics                 | GAPDH         | 19.2      | 19.9  | 19.44 |
| HTR-8     | miR-218-1-3p mimics | GAPDH                               | 17.85         | 18.55     | 18.26 |       |
| Fig. 1F   | JEG3                | NC mimics                           | IL-1 $\beta$  | 23.57     | 23.95 | 23.9  |
|           | HTR-8               | NC mimics                           | IL-1 $\beta$  | 21.6      | 21.43 | 21.37 |
|           | JEG3                | miR-218-1-3p mimics                 | IL-1 $\beta$  | 22.19     | 22    | 21.77 |
|           | HTR-8               | miR-218-1-3p mimics                 | IL-1 $\beta$  | 20.35     | 20.08 | 19.96 |
|           | JEG3                | NC mimics                           | GAPDH         | 19.92     | 19.44 | 19.36 |
|           | HTR-8               | NC mimics                           | GAPDH         | 18.76     | 18.5  | 17.95 |
|           | JEG3                | miR-218-1-3p mimics                 | GAPDH         | 18.93     | 19.25 | 19.37 |
| HTR-8     | miR-218-1-3p mimics | GAPDH                               | 17.84         | 18.83     | 17.89 |       |
| Fig. 1G   | JEG3                | NC mimics                           | TNF- $\alpha$ | 24.28     | 24.12 | 24.39 |
|           | HTR-8               | NC mimics                           | TNF- $\alpha$ | 22.12     | 22.53 | 22.12 |
|           | JEG3                | miR-218-1-3p mimics                 | TNF- $\alpha$ | 22.15     | 22.28 | 21.96 |
|           | HTR-8               | miR-218-1-3p mimics                 | TNF- $\alpha$ | 21.49     | 21.07 | 21.26 |
|           | JEG3                | NC mimics                           | GAPDH         | 19.86     | 19.37 | 19.26 |
|           | HTR-8               | NC mimics                           | GAPDH         | 18.65     | 18.31 | 18.46 |
|           | JEG3                | miR-218-1-3p mimics                 | GAPDH         | 19.39     | 18.95 | 19.29 |
| HTR-8     | miR-218-1-3p mimics | GAPDH                               | 18.73         | 18.76     | 18.55 |       |
| Fig. 1H   | JEG3                | NC mimics                           | CXCL-8        | 24.86     | 25.02 | 24.81 |
|           | HTR-8               | NC mimics                           | CXCL-8        | 23.84     | 23.65 | 23.77 |
|           | JEG3                | miR-218-1-3p mimics                 | CXCL-8        | 23.44     | 23.79 | 23.63 |
|           | HTR-8               | miR-218-1-3p mimics                 | CXCL-8        | 22.21     | 22.29 | 22.56 |
|           | JEG3                | NC mimics                           | GAPDH         | 19.16     | 19.06 | 19.29 |
|           | HTR-8               | NC mimics                           | GAPDH         | 18.12     | 18.69 | 18.43 |
|           | JEG3                | miR-218-1-3p mimics                 | GAPDH         | 19.59     | 19.69 | 19.35 |
| HTR-8     | miR-218-1-3p mimics | GAPDH                               | 18.61         | 18.15     | 18.7  |       |
| Fig. 2F   | JEG3                | pcDNA3.1                            | miR-218-1-3p  | 26.81     | 26.83 | 27.08 |
|           | HTR-8               | pcDNA3.1                            | miR-218-1-3p  | 26.12     | 26.28 | 26.1  |
|           | JEG3                | pcDNA3.1-JUN                        | miR-218-1-3p  | 24.75     | 24.78 | 25.11 |
|           | HTR-8               | pcDNA3.1-JUN                        | miR-218-1-3p  | 24.52     | 24.48 | 24.8  |
|           | JEG3                | pcDNA3.1                            | U6            | 19.4      | 19.38 | 19.55 |
|           | HTR-8               | pcDNA3.1                            | U6            | 17.95     | 17.65 | 18.45 |
|           | JEG3                | pcDNA3.1-JUN                        | U6            | 19.52     | 19.34 | 19.02 |
| HTR-8     | pcDNA3.1-JUN        | U6                                  | 17.56         | 18.28     | 18.36 |       |
| Fig. 2I   | JEG3                | Control                             | miR-218-1-3p  | 26.87     | 26.89 | 27.1  |
|           | HTR-8               | Control                             | miR-218-1-3p  | 27.17     | 26.83 | 26.66 |
|           | JEG3                | TCS                                 | miR-218-1-3p  | 25.04     | 25.15 | 24.75 |
|           | HTR-8               | TCS                                 | miR-218-1-3p  | 25.14     | 24.72 | 24.87 |
|           | JEG3                | TCS+sh-JUN                          | miR-218-1-3p  | 26.87     | 26.66 | 26.98 |
|           | HTR-8               | TCS+sh-JUN                          | miR-218-1-3p  | 26.71     | 26.54 | 26.31 |
|           | JEG3                | Control                             | U6            | 19.09     | 18.78 | 19.4  |
|           | HTR-8               | Control                             | U6            | 17.68     | 18.42 | 18.23 |
|           | JEG3                | TCS                                 | U6            | 19.5      | 18.97 | 19.46 |
|           | HTR-8               | TCS                                 | U6            | 18.12     | 18.07 | 18.05 |
|           | JEG3                | TCS+sh-JUN                          | U6            | 18.9      | 19.61 | 18.7  |
| HTR-8     | TCS+sh-JUN          | U6                                  | 17.83         | 17.86     | 17.6  |       |
| Figure 3A | JEG3                | Control                             | PSME3         | 24.44     | 24.49 | 24.6  |
|           | JEG3                | TCS                                 | PSME3         | 25.03     | 25.3  | 25.12 |
|           | JEG3                | Control                             | HOXA11        | 24.47     | 24.3  | 24.09 |
|           | JEG3                | TCS                                 | HOXA11        | 23.65     | 23.95 | 23.85 |
|           | JEG3                | Control                             | CD8B          | 22.92     | 22.91 | 22.69 |
|           | JEG3                | TCS                                 | CD8B          | 23.53     | 23.18 | 23.42 |
|           | JEG3                | Control                             | HK1           | 23.76     | 23.74 | 24.01 |
| JEG3      | TCS                 | HK1                                 | 23.98         | 24.2      | 24.38 |       |

|                            |         |                            |               |       |       |       |       |
|----------------------------|---------|----------------------------|---------------|-------|-------|-------|-------|
| Figure 3A                  | JEG3    | Control                    | GALP          | 22.47 | 22.57 | 22.38 |       |
|                            | JEG3    | TCS                        | GALP          | 22.58 | 22.87 | 22.8  |       |
|                            | JEG3    | Control                    | HIST1H2AI     | 24.55 | 24.65 | 24.76 |       |
|                            | JEG3    | TCS                        | HIST1H2AI     | 24.71 | 25.14 | 25.03 |       |
|                            | JEG3    | Control                    | SLC35C1       | 21.29 | 21.43 | 21.25 |       |
|                            | JEG3    | TCS                        | SLC35C1       | 23.33 | 23.66 | 24.13 |       |
|                            | JEG3    | Control                    | GAPDH         | 19.57 | 19.17 | 19.39 |       |
|                            | JEG3    | TCS                        | GAPDH         | 19.88 | 19.54 | 19.64 |       |
| Figure 3B                  | HTR-8   | Control                    | CD8B          | 25.11 | 25.1  | 24.82 |       |
|                            | HTR-8   | TCS                        | CD8B          | 25.09 | 25.38 | 25.14 |       |
|                            | HTR-8   | Control                    | SLC35C1       | 24.07 | 23.79 | 24.13 |       |
|                            | HTR-8   | TCS                        | SLC35C1       | 25.35 | 25.72 | 25.62 |       |
|                            | HTR-8   | Control                    | GAPDH         | 18.57 | 17.96 | 18.48 |       |
|                            | HTR-8   | TCS                        | GAPDH         | 18.06 | 18.23 | 18.56 |       |
| Figure 3D                  | JEG3    | NC mimics                  | SLC35C1       | 21.93 | 22.08 | 22.13 |       |
|                            | HTR-8   | NC mimics                  | SLC35C1       | 23.51 | 23.63 | 23.66 |       |
|                            | JEG3    | miR-218-1-3p mimics        | SLC35C1       | 24.03 | 24.19 | 24.29 |       |
|                            | HTR-8   | miR-218-1-3p mimics        | SLC35C1       | 25.22 | 25.16 | 25.46 |       |
|                            | JEG3    | NC mimics                  | GAPDH         | 19.37 | 19.68 | 19.43 |       |
|                            | HTR-8   | NC mimics                  | GAPDH         | 17.84 | 18.73 | 18.55 |       |
|                            | JEG3    | miR-218-1-3p mimics        | GAPDH         | 19.13 | 19.18 | 19.61 |       |
|                            | HTR-8   | miR-218-1-3p mimics        | GAPDH         | 18.45 | 17.9  | 17.93 |       |
| Figure 3E (原<br>Figure 3F) | JEG3    | NC inhibitor               | SLC35C1       | 21.19 | 21.38 | 21.13 |       |
|                            | HTR-8   | NC inhibitor               | SLC35C1       | 23.93 | 23.94 | 24.11 |       |
|                            | JEG3    | miR-218-1-3p inhibitor     | SLC35C1       | 18.13 | 17.89 | 18.22 |       |
|                            | HTR-8   | miR-218-1-3p inhibitor     | SLC35C1       | 22.11 | 22.03 | 22.38 |       |
|                            | JEG3    | NC inhibitor               | GAPDH         | 19.66 | 19.57 | 19.87 |       |
|                            | HTR-8   | NC inhibitor               | GAPDH         | 17.95 | 18.59 | 18.41 |       |
|                            | JEG3    | miR-218-1-3p inhibitor     | GAPDH         | 19.07 | 18.94 | 19.35 |       |
|                            | HTR-8   | miR-218-1-3p inhibitor     | GAPDH         | 18.25 | 17.85 | 18.76 |       |
| Figure 4A                  | JEG3    | sh-NC                      | SLC35C1       | 22.01 | 21.61 | 21.94 |       |
|                            | HTR-8   | sh-NC                      | SLC35C1       | 23.77 | 24.28 | 24.1  |       |
|                            | JEG3    | sh-SLC35C1#1               | SLC35C1       | 24.35 | 24.08 | 23.94 |       |
|                            | HTR-8   | sh-SLC35C1#1               | SLC35C1       | 25.83 | 25.48 | 25.8  |       |
|                            | JEG3    | sh-SLC35C1#2               | SLC35C1       | 23.4  | 23.03 | 23.28 |       |
|                            | HTR-8   | sh-SLC35C1#2               | SLC35C1       | 25.48 | 25.19 | 25.43 |       |
|                            | JEG3    | sh-NC                      | GAPDH         | 19.51 | 19.77 | 19.44 |       |
|                            | HTR-8   | sh-NC                      | GAPDH         | 18.14 | 18.09 | 18.48 |       |
|                            | JEG3    | sh-SLC35C1#1               | GAPDH         | 19.14 | 19.59 | 19.75 |       |
|                            | HTR-8   | sh-SLC35C1#1               | GAPDH         | 18.31 | 18.3  | 17.88 |       |
|                            | JEG3    | sh-SLC35C1#2               | GAPDH         | 19.52 | 19.64 | 19.07 |       |
|                            | HTR-8   | sh-SLC35C1#2               | GAPDH         | 18.13 | 18.7  | 18.39 |       |
|                            | Fig. 4D | JEG3                       | sh-NC         | IL-6  | 23.18 | 23.16 | 23.33 |
|                            |         | HTR-8                      | sh-NC         | IL-6  | 22.53 | 22.7  | 22.78 |
| JEG3                       |         | sh-SLC35C1#1               | IL-6          | 22.56 | 22.29 | 22.59 |       |
| HTR-8                      |         | sh-SLC35C1#1               | IL-6          | 21.94 | 21.73 | 21.53 |       |
| JEG3                       |         | sh-NC                      | GAPDH         | 19.74 | 18.98 | 19.44 |       |
| HTR-8                      |         | sh-NC                      | GAPDH         | 18.78 | 18.42 | 17.97 |       |
| JEG3                       |         | sh-SLC35C1#1               | GAPDH         | 19.39 | 19.88 | 19.68 |       |
| HTR-8                      |         | sh-SLC35C1#1               | GAPDH         | 18.45 | 18.79 | 18.04 |       |
| JEG3                       |         | sh-NC                      | IL-1 $\beta$  | 24.03 | 24.48 | 24.34 |       |
| HTR-8                      |         | sh-NC                      | IL-1 $\beta$  | 22.27 | 21.93 | 21.91 |       |
| JEG3                       |         | sh-SLC35C1#1               | IL-1 $\beta$  | 23.35 | 23.12 | 23.38 |       |
| HTR-8                      |         | sh-SLC35C1#1               | IL-1 $\beta$  | 20.69 | 20.94 | 20.54 |       |
| JEG3                       |         | sh-NC                      | GAPDH         | 19.8  | 19.63 | 19.5  |       |
| HTR-8                      |         | sh-NC                      | GAPDH         | 18.25 | 18.15 | 17.97 |       |
| JEG3                       |         | sh-SLC35C1#1               | GAPDH         | 19.73 | 19.75 | 19.45 |       |
| HTR-8                      |         | sh-SLC35C1#1               | GAPDH         | 18.28 | 18.34 | 17.96 |       |
| JEG3                       |         | sh-NC                      | TNF- $\alpha$ | 23.6  | 23.79 | 23.93 |       |
| HTR-8                      |         | sh-NC                      | TNF- $\alpha$ | 22.7  | 22.52 | 22.82 |       |
| JEG3                       |         | sh-SLC35C1#1               | TNF- $\alpha$ | 21.76 | 21.98 | 22.11 |       |
| HTR-8                      |         | sh-SLC35C1#1               | TNF- $\alpha$ | 20.29 | 20.61 | 20.39 |       |
| JEG3                       |         | sh-NC                      | GAPDH         | 19.69 | 19.08 | 19.4  |       |
| HTR-8                      |         | sh-NC                      | GAPDH         | 18.37 | 18.04 | 18.37 |       |
| JEG3                       |         | sh-SLC35C1#1               | GAPDH         | 19.68 | 19.57 | 19.84 |       |
| HTR-8                      |         | sh-SLC35C1#1               | GAPDH         | 18.13 | 17.93 | 18.33 |       |
| JEG3                       |         | sh-NC                      | CXCL-8        | 24.36 | 24.38 | 24.09 |       |
| HTR-8                      |         | sh-NC                      | CXCL-8        | 22.88 | 23.01 | 23.04 |       |
| JEG3                       |         | sh-SLC35C1#1               | CXCL-8        | 22.45 | 22.71 | 22.8  |       |
| HTR-8                      |         | sh-SLC35C1#1               | CXCL-8        | 20.93 | 21.25 | 21.13 |       |
| JEG3                       |         | sh-NC                      | GAPDH         | 19.34 | 19.3  | 19.87 |       |
| HTR-8                      |         | sh-NC                      | GAPDH         | 18.01 | 18.19 | 18.48 |       |
| JEG3                       |         | sh-SLC35C1#1               | GAPDH         | 18.97 | 19.8  | 19.27 |       |
| HTR-8                      |         | sh-SLC35C1#1               | GAPDH         | 17.89 | 18.48 | 18.07 |       |
| JEG3                       |         | Control                    | SLC35C1       | 22.17 | 22.04 | 21.98 |       |
| HTR-8                      |         | Control                    | SLC35C1       | 23.83 | 24.06 | 24    |       |
| JEG3                       |         | TCS                        | SLC35C1       | 24.05 | 24.38 | 24.44 |       |
| HTR-8                      |         | TCS                        | SLC35C1       | 25.62 | 25.93 | 25.96 |       |
| JEG3                       |         | TCS+miR-218-1-3p inhibitor | SLC35C1       | 22.57 | 22.5  | 22.79 |       |

|         |                                         |                                         |               |       |       |       |
|---------|-----------------------------------------|-----------------------------------------|---------------|-------|-------|-------|
| Fig. 5A | HTR-8                                   | TCS+miR-218-1-3p inhibitor              | SLC35C1       | 24.05 | 24.36 | 24.25 |
|         | JEG3                                    | TCS+miR-218-1-3p inhibitor+sh-SLC35C1#1 | SLC35C1       | 24.18 | 24.08 | 23.8  |
|         | HTR-8                                   | TCS+miR-218-1-3p inhibitor+sh-SLC35C1#1 | SLC35C1       | 25.8  | 25.51 | 25.42 |
|         | JEG3                                    | Control                                 | GAPDH         | 19.24 | 19.05 | 19.49 |
|         | HTR-8                                   | Control                                 | GAPDH         | 18.66 | 18.66 | 17.85 |
|         | JEG3                                    | TCS                                     | GAPDH         | 19.42 | 19    | 19.31 |
|         | HTR-8                                   | TCS                                     | GAPDH         | 18.13 | 18.51 | 18.47 |
|         | JEG3                                    | TCS+miR-218-1-3p inhibitor              | GAPDH         | 19.85 | 19.84 | 19.42 |
|         | HTR-8                                   | TCS+miR-218-1-3p inhibitor              | GAPDH         | 18.64 | 18.77 | 18.4  |
|         | JEG3                                    | TCS+miR-218-1-3p inhibitor+sh-SLC35C1#1 | GAPDH         | 19.64 | 19.5  | 19.51 |
|         | HTR-8                                   | TCS+miR-218-1-3p inhibitor+sh-SLC35C1#1 | GAPDH         | 18.67 | 17.93 | 18.14 |
| Fig. 5D | JEG3                                    | Control                                 | IL-6          | 23.84 | 23.63 | 23.77 |
|         | HTR-8                                   | Control                                 | IL-6          | 22.9  | 22.37 | 22.66 |
|         | JEG3                                    | TCS                                     | IL-6          | 22.39 | 22.14 | 22.07 |
|         | HTR-8                                   | TCS                                     | IL-6          | 22    | 22.37 | 22.18 |
|         | JEG3                                    | TCS+miR-218-1-3p inhibitor              | IL-6          | 23.28 | 23.53 | 23.64 |
|         | HTR-8                                   | TCS+miR-218-1-3p inhibitor              | IL-6          | 22.77 | 22.97 | 23.08 |
|         | JEG3                                    | TCS+miR-218-1-3p inhibitor+sh-SLC35C1#1 | IL-6          | 21.93 | 22.15 | 22.25 |
|         | HTR-8                                   | TCS+miR-218-1-3p inhibitor+sh-SLC35C1#1 | IL-6          | 21.76 | 22.05 | 21.87 |
|         | JEG3                                    | Control                                 | GAPDH         | 19.89 | 19.64 | 19.49 |
|         | HTR-8                                   | Control                                 | GAPDH         | 18.06 | 18.09 | 18.27 |
|         | JEG3                                    | TCS                                     | GAPDH         | 19.2  | 19.85 | 19.3  |
|         | HTR-8                                   | TCS                                     | GAPDH         | 18.55 | 18.47 | 18.45 |
|         | JEG3                                    | TCS+miR-218-1-3p inhibitor              | GAPDH         | 19.87 | 19.03 | 19.33 |
|         | HTR-8                                   | TCS+miR-218-1-3p inhibitor              | GAPDH         | 17.9  | 18.65 | 18.64 |
|         | JEG3                                    | TCS+miR-218-1-3p inhibitor+sh-SLC35C1#1 | GAPDH         | 19.28 | 19.74 | 19.15 |
| HTR-8   | TCS+miR-218-1-3p inhibitor+sh-SLC35C1#1 | GAPDH                                   | 18.59         | 18.06 | 17.99 |       |
| Fig. 5E | JEG3                                    | Control                                 | IL-1 $\beta$  | 23.71 | 23.9  | 23.91 |
|         | HTR-8                                   | Control                                 | IL-1 $\beta$  | 22.37 | 22    | 22.03 |
|         | JEG3                                    | TCS                                     | IL-1 $\beta$  | 22.78 | 23.08 | 22.84 |
|         | HTR-8                                   | TCS                                     | IL-1 $\beta$  | 21.16 | 20.96 | 21.35 |
|         | JEG3                                    | TCS+miR-218-1-3p inhibitor              | IL-1 $\beta$  | 23.58 | 23.74 | 23.4  |
|         | HTR-8                                   | TCS+miR-218-1-3p inhibitor              | IL-1 $\beta$  | 22.13 | 21.99 | 21.74 |
|         | JEG3                                    | TCS+miR-218-1-3p inhibitor+sh-SLC35C1#1 | IL-1 $\beta$  | 23.01 | 22.7  | 22.66 |
|         | HTR-8                                   | TCS+miR-218-1-3p inhibitor+sh-SLC35C1#1 | IL-1 $\beta$  | 21.26 | 21.56 | 21.34 |
|         | JEG3                                    | Control                                 | GAPDH         | 19.45 | 19.2  | 19.39 |
|         | HTR-8                                   | Control                                 | GAPDH         | 18.63 | 18.03 | 18.24 |
|         | JEG3                                    | TCS                                     | GAPDH         | 19.31 | 19.28 | 19.5  |
|         | HTR-8                                   | TCS                                     | GAPDH         | 18.08 | 18.48 | 18.02 |
|         | JEG3                                    | TCS+miR-218-1-3p inhibitor              | GAPDH         | 19.48 | 19.27 | 18.97 |
|         | HTR-8                                   | TCS+miR-218-1-3p inhibitor              | GAPDH         | 18    | 18.36 | 18.3  |
|         | JEG3                                    | TCS+miR-218-1-3p inhibitor+sh-SLC35C1#1 | GAPDH         | 19.45 | 19.35 | 18.95 |
| HTR-8   | TCS+miR-218-1-3p inhibitor+sh-SLC35C1#1 | GAPDH                                   | 17.92         | 18.79 | 18.59 |       |
| Fig. 5F | JEG3                                    | Control                                 | TNF- $\alpha$ | 24.64 | 24.39 | 24.16 |
|         | HTR-8                                   | Control                                 | TNF- $\alpha$ | 22.65 | 22.78 | 22.99 |
|         | JEG3                                    | TCS                                     | TNF- $\alpha$ | 23.29 | 22.91 | 23.12 |
|         | HTR-8                                   | TCS                                     | TNF- $\alpha$ | 20.76 | 21.09 | 20.87 |
|         | JEG3                                    | TCS+miR-218-1-3p inhibitor              | TNF- $\alpha$ | 24.78 | 24.52 | 24.83 |
|         | HTR-8                                   | TCS+miR-218-1-3p inhibitor              | TNF- $\alpha$ | 22.6  | 22.99 | 22.65 |
|         | JEG3                                    | TCS+miR-218-1-3p inhibitor+sh-SLC35C1#1 | TNF- $\alpha$ | 22.81 | 22.42 | 22.67 |
|         | HTR-8                                   | TCS+miR-218-1-3p inhibitor+sh-SLC35C1#1 | TNF- $\alpha$ | 21.14 | 21.41 | 21    |
|         | JEG3                                    | Control                                 | GAPDH         | 19.33 | 19.14 | 18.95 |
|         | HTR-8                                   | Control                                 | GAPDH         | 18.07 | 18.64 | 18.27 |
|         | JEG3                                    | TCS                                     | GAPDH         | 19.61 | 19.42 | 19.82 |
|         | HTR-8                                   | TCS                                     | GAPDH         | 18.26 | 18.8  | 18.22 |
|         | JEG3                                    | TCS+miR-218-1-3p inhibitor              | GAPDH         | 19.83 | 19.39 | 19.46 |
|         | HTR-8                                   | TCS+miR-218-1-3p inhibitor              | GAPDH         | 18.51 | 18.54 | 17.89 |
|         | JEG3                                    | TCS+miR-218-1-3p inhibitor+sh-SLC35C1#1 | GAPDH         | 19.08 | 19.76 | 18.97 |
|         | HTR-8                                   | TCS+miR-218-1-3p inhibitor+sh-SLC35C1#1 | GAPDH         | 18.79 | 18.55 | 18.22 |
|         | JEG3                                    | Control                                 | CXCL-8        | 24.29 | 24.1  | 24.12 |
|         | HTR-8                                   | Control                                 | CXCL-8        | 23.18 | 23.2  | 22.99 |
| JEG3    | TCS                                     | CXCL-8                                  | 22.65         | 22.27 | 22.4  |       |
| HTR-8   | TCS                                     | CXCL-8                                  | 21            | 20.98 | 21.37 |       |

|            |                                         |                                         |               |       |       |       |
|------------|-----------------------------------------|-----------------------------------------|---------------|-------|-------|-------|
| Fig. 5G    | JEG3                                    | TCS+miR-218-1-3p inhibitor              | CXCL-8        | 23.95 | 24.3  | 24.03 |
|            | HTR-8                                   | TCS+miR-218-1-3p inhibitor              | CXCL-8        | 22.57 | 22.84 | 22.67 |
|            | JEG3                                    | TCS+miR-218-1-3p inhibitor+sh-SLC35C1#1 | CXCL-8        | 22.68 | 22.94 | 22.52 |
|            | HTR-8                                   | TCS+miR-218-1-3p inhibitor+sh-SLC35C1#1 | CXCL-8        | 20.99 | 21.22 | 21.24 |
|            | JEG3                                    | Control                                 | GAPDH         | 19.81 | 19.38 | 19.53 |
|            | HTR-8                                   | Control                                 | GAPDH         | 18.78 | 18.52 | 18.43 |
|            | JEG3                                    | TCS                                     | GAPDH         | 19.16 | 19.1  | 19.24 |
|            | HTR-8                                   | TCS                                     | GAPDH         | 17.85 | 18.48 | 18.81 |
|            | JEG3                                    | TCS+miR-218-1-3p inhibitor              | GAPDH         | 19.87 | 19.7  | 19.1  |
|            | HTR-8                                   | TCS+miR-218-1-3p inhibitor              | GAPDH         | 18.75 | 18.28 | 18.26 |
|            | JEG3                                    | TCS+miR-218-1-3p inhibitor+sh-SLC35C1#1 | GAPDH         | 19.16 | 19.52 | 19.8  |
| HTR-8      | TCS+miR-218-1-3p inhibitor+sh-SLC35C1#1 | GAPDH                                   | 18.01         | 18.4  | 18.31 |       |
| Figure S1D | JEG3                                    | Control                                 | IL-6          | 24.22 | 23.86 | 23.67 |
|            | HTR-8                                   | Control                                 | IL-6          | 22.99 | 22.85 | 22.81 |
|            | JEG3                                    | TCS                                     | IL-6          | 23.44 | 23.25 | 23.09 |
|            | HTR-8                                   | TCS                                     | IL-6          | 22.93 | 22.67 | 22.53 |
|            | JEG3                                    | Control                                 | GAPDH         | 19.11 | 19.26 | 19.67 |
|            | HTR-8                                   | TCS                                     | GAPDH         | 18.55 | 18.48 | 18.43 |
| Figure S1E | JEG3                                    | Control                                 | IL-1 $\beta$  | 23.93 | 23.95 | 23.72 |
|            | HTR-8                                   | Control                                 | IL-1 $\beta$  | 22.03 | 21.81 | 22.15 |
|            | JEG3                                    | TCS                                     | IL-1 $\beta$  | 22.79 | 22.92 | 23.15 |
|            | HTR-8                                   | TCS                                     | IL-1 $\beta$  | 21.07 | 20.76 | 21.11 |
|            | JEG3                                    | Control                                 | GAPDH         | 19.4  | 19.35 | 19.17 |
|            | HTR-8                                   | TCS                                     | GAPDH         | 18.53 | 18.4  | 18    |
| Figure S1F | JEG3                                    | Control                                 | TNF- $\alpha$ | 24.2  | 23.95 | 24.26 |
|            | HTR-8                                   | Control                                 | TNF- $\alpha$ | 23.03 | 23.25 | 22.97 |
|            | JEG3                                    | TCS                                     | TNF- $\alpha$ | 22.38 | 22.6  | 22.21 |
|            | HTR-8                                   | TCS                                     | TNF- $\alpha$ | 21.96 | 22.29 | 21.99 |
|            | JEG3                                    | Control                                 | GAPDH         | 18.95 | 19.14 | 19.85 |
|            | HTR-8                                   | TCS                                     | GAPDH         | 18.19 | 18.78 | 18.83 |
| Figure S1G | JEG3                                    | Control                                 | CXCL-8        | 24.9  | 24.8  | 25.09 |
|            | HTR-8                                   | Control                                 | CXCL-8        | 23.84 | 23.77 | 23.63 |
|            | JEG3                                    | TCS                                     | CXCL-8        | 23.25 | 22.87 | 22.9  |
|            | HTR-8                                   | TCS                                     | CXCL-8        | 22.62 | 22.71 | 22.36 |
|            | JEG3                                    | Control                                 | GAPDH         | 18.95 | 19.85 | 19.37 |
|            | HTR-8                                   | TCS                                     | GAPDH         | 18.34 | 18.02 | 18.24 |
